# Supplementary material for: The First Description of the Microbial Diversity in the Amarillo River (La Rioja, Argentina), a Natural Extreme Environment Where the Whole Microbial Community Paints the Landscape Yellow
Source: MDPI journal article supplement (doi:10.3390/microorganisms12020235), 2024-01-23
Supplement: s1 [file s1]

Venn Diagram Fungi. Common ASVs and taxonomic affiliation according Silva database

ACP: Cueva de Perez terraces

AR: Amarillo River

FeEC: Fe(II) enrichment cultures

#### **ACP-AR-FeEC**

35 ASVs

*Rhodotorula* (2 ASVs), *Vishniacozyma*, *Naganishia*, *Bjerkandera*, unknown Fungi (2 ASVs), *Debaryomyces* (2 ASVs), *Coronicium*, *Microdochium*, *Sporothrix*, *Simplicillium*, *Leptobacillium*, unknown Sordariomycetes, *Cladosporium*, *Acrodontium*, *Fodinomyces*, *Verrucoconiothyrium*, *Alternaria*, *Knufia*, *Aspergillus*, *Penicillium* (5 ASVs), *Talaromyces* (2 ASVs), unknown Helotiales (2 ASVs), *Acidea*, unknown Ascomycota, *Acarospora*, *Talaromyces*, *Coniosporium*.

#### **ACP-AR**

16 ASVs

*Rhodotorula*, *Filobasidium*, unknown Fungi (2 ASVs), *Meyerozyma*, *Peroneutypa*, *Trichoderma*, unknown Capnodiales, unknown Chaetothyriales, *Peyronella*, *Leptospora*, unknown Pleosporales, *Aspergillus*, unknown Helotiales (2 ASVs), *Oidiodendron*

#### **ACP-FeEC**

21 ASVs

*Hohenbuehelia*, *Malassezia* (7 ASVs), *Kondoa*, *Phialemonium*, *Peltaster*, *Toxicocladosporium*, *Cladosporium*, *Mycosphaerella*, *Cladosporium*, unknown Fungi, *Neosulcatispora*, *Knufia*, *Aspergillus*, *Penicillium*, unknown Ramalinaceae, *Aureobasidium*

AR-FeEC

**4 ASVs**

*Microsporomyces*, *Acidea* (3 ASVs)
